# Supplementary material for: Effectiveness of Sentinel-1 and Sentinel-2 for flood detection assessment in Europe
Source: Copernicus journal article supplement (doi:10.5194/nhess-22-2473-2022), 2022-08-02
Supplement: Supplementary file 1 [file nhess-22-2473-2022-supplement.zip]

Archive with 3 entries (3 files):
- myvideo.mp4
- nhess-22-2473-2022-supplement-title-page.pdf
- myvideo.srt
