# Supplementary material for: Effectiveness of Sentinel-1 and Sentinel-2 for flood detection assessment in Europe
Source: Copernicus journal article supplement (doi:10.5194/nhess-22-2473-2022), 2022-08-02
Supplement: Supplementary file 1 [file nhess-22-2473-2022-supplement.zip › myvideo.srt]

1
00:00:00,Sentinel-1A (22/01/2015)

2
00:00:01,Sentinel-1A (03/02/2015)

3
00:00:02,Sentinel-1A (04/02/2015)

4
00:00:03,Sentinel-1A (09/02/2015)

5
00:00:04,Sentinel-1A (15/02/2015)

6
00:00:05,Sentinel-1A (16/02/2015)

7
00:00:06,Sentinel-1A (21/02/2015)

8
00:00:07,Sentinel-1A (27/02/2015)

9
00:00:08,Sentinel-1A (28/02/2015)

10
00:00:09,Sentinel-1A (05/03/2015)

11
00:00:10,Sentinel-1A (11/03/2015)

12
00:00:11,Sentinel-1A (12/03/2015)

13
00:00:12,Sentinel-1A (17/03/2015)

14
00:00:13,Sentinel-1A (23/03/2015)

15
00:00:14,Sentinel-1A (24/03/2015)

16
00:00:15,Sentinel-1A (29/03/2015)
