# Supplementary material for: Effectiveness of Sentinel-1 and Sentinel-2 for flood detection assessment in Europe
Source: Copernicus journal article supplement (doi:10.5194/nhess-22-2473-2022), 2022-08-02
Supplement: Supplementary file 1 [file nhess-22-2473-2022-supplement.zip › nhess-22-2473-2022-supplement-title-page.pdf]

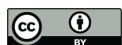

*Supplement of*

## **Effectiveness of Sentinel-1 and Sentinel-2 for flood detection assessment in Europe**

**Angelica Tarpanelli et al.**

*Correspondence to:* Angelica Tarpanelli ([angelica.tarpanelli@irpi.cnr.it](mailto:angelica.tarpanelli@irpi.cnr.it))

- [nhess-22-2473-2022-supplement-title-page.pdf](#)
- [myvideo.mp4](#)
- [myvideo.srt](#)

The copyright of individual parts of the supplement might differ from the article licence.
